# Supplementary material for: The efficacy of a brief app-based mindfulness intervention on psychosocial outcomes in healthy adults: A pilot randomised controlled trial
Source: PLoS One. 2018 Dec 31;13(12):e0209482. doi: 10.1371/journal.pone.0209482 (PMC6312207; doi:10.1371/journal.pone.0209482)
Supplement: S1 Dataset — Anonymised data for the mindfulness meditation and wait-list control group including sociodemographic data and outcome data across all three timepoints. (XLSX) [file pone.0209482.s004.xlsx]

## Sheet: all raw data
Group (A = mindfulness, B = wait-list)	age	Gender (1 = male, 2 = female)	SWLS baseline	SWLS day 10	SWLS day 30	PSS baseline	PSS day 10	PSS day 30	RWS baseline	RWS day 10	RWS day 30	GHQ	Number of days Headspace used between baseline to day 10	“To what to extent are you finding completing the activities enjoyable?” (day 10; 1 = not at all, to 7 = extremely)	“To what extent are you finding the activity difficult to complete?” (day 10; 1 = very difficult, to 7 = very easy).	Number of days Headspace used between day 10 and day 30	“To what to extent are you finding completing the activities enjoyable?” (day 30; 1 = not at all, to 7 = extremely)	“To what extent are you finding the activity difficult to complete?” (day 30; 1 = very difficult, to 7 = very easy)
A	50	2	18	24	24	16	14	11	71	80	85	3	6	4	5	14	5	4
A	38	1	23	25	24	13	12	14	63	67	62	8	5	4	5	6	4	3
A	38	2	23	21	31	19	18	3	69	79	92	2	2	6	6	11	6	7
A	39	2	31	31	33	15	12	6	84	83	87	4	10	5	5	11	6	4
A	43	2	24	28	18	16	13	13	74	80	71	1	4	3	4	9	4	2
A	40	1	16	23	29	23	19	12	53	67	88	8	8	5	3	11	5	3
A	41	2	24	28	35	23	20	3	86	82	94	4	6	7	5	21	7	7
A	46	2	15	25	33	20	14	2	74	86	98	4	8	6	5	19	7	7
A	33	1	28	28	28	23	20	19	70	69	69	0	6	5	3	8	3	3
A	41	1	22	27	27	18	15	12	72	76	82	6	6	6	4	7	5	3
A	50	1	13	16	28	27	20	8	49	48	81	9	6	7	4	9	5	6
A	39	1	28	22	31	9	7	7	81	85	85	1	4	4	3	7	2	3
A	41	2	21	29	30	14	13	6	80	78	88	4	6	5	5	16	6	6
A	36	1	30	30	30	14	13	21	73	82	74	9	8	5	7	10	4	3
A	42	1	22	23	22	17	20	19	64	71	74	0	10	5	2	21	5	4
A	44	2	28	23	28	20	18	18	96	94	94	2	2	5	3	6	6	2
A	44	2	29	31	34	5	3	1	79	85	96	0	1	4	1	20	6	6
A	41	1	26	26	29	14	6	11	98	98	98	0	10	7	7	1	7	6
A	36	1	35	35	33	16	16	12	85	90	92	4	9	6	7	11	7	4
A	35	1	19	18	19	18	16	15	62	65	71	9	10	5	4	17	6	4
A	39	2	27	28	28	15	11	12	64	77	80	6	3	5	3	3	4	2
A	35	2	26	29	30	14	12	7	81	79	81	1	6	5	4	16	5	4
A	37	1	29	29	30	16	19	17	74	73	75	4	2	6	4	5	5	3
A	41	2	30	28	30	12	22	10	72	78	84	2	6	5	2	18	5	4
A	42	1	18	30	19	13	11	14	82	76	78	1	6	6	7	16	6	6
A	41	1	25	22	22	16	20	19	64	66	66	0	10	2	6	21	2	7
A	40	1	17	21	20	27	21	18	60	63	65	8	5	5	4	6	4	3
A	37	1	29	29	30	16	9	7	89	89	84	4	7	2	2	1	1	1
A	36	2	25	25	28	21	18	14	68	66	80	4	8	6	6	17	6	5
A	41	2	26			19			86			6
A	31	1	10			15			69			3
A	45	1	23			17			77			3
A	40	1	27			16			81			2
A	47	2	20	24		8	13		72	79		3
A	39	1	34			7			92			0
A	44	2	32			12			86			0
A	39	1	21	25		22	16		57	65		6
A	40	1	25			28			81			5
B	38	2	26	28	26	13	16	18	58	66	59	2
B	37	2	21	25	16	24	19	21	76	73	75	7
B	29	2	27	27	24	21	26	26	74	76	75	0
B	36	2	33	33	33	18	20	18	86	87	86	0
B	41	2	20	22	26	22	22	24	47	54	69	8
B	39	2	12	14	14	26	23	23	60	55	60	5
B	42	2	17	19	13	20	19	19	86	84	79	5
B	40	1	28	30	28	18	17	16	68	73	63	0
B	28	2	27	26	29	14	13	17	71	75	79	3
B	37	1	21	14	19	12	14	22	77	71	80	2
B	36	1	24	22	25	21	16	18	77	84	83	0
B	39	1	31	29	29	27	24	21	82	79	80	10
B	32	1	20	23	20	20	18	26	65	72	83	2
B	45	2	28	30	30	10	8	17	76	84	88	0
B	38	2	11	11	10	26	28	22	45	47	60	10
B	41	2	15	17	19	22	16	19	75	68	66	0
B	32	2	31	30	32	11	8	21	94	90	87	0
B	49	2	21	29	26	6	12	21	92	88	75	3
B	43	2	23	15	17	12	17	24	85	73	69	3
B	44	1	29	27	28	16	18	20	76	83	78	3
B	30	2	27	28	27	12	9	18	78	84	94	3
B	25	1	24	22	24	19	17	23	74	74	68	3
B	37	2	26	27	26	23	17	20	75	76	77	1
B	31	2	31	26	29	23	16	16	82	83	79	2
B	43	2	22	25	26	20	15	24	73	81	89	9
B	38	2	27	28	29	16	12	15	73	65	65	4
B	37	2	30	29	30	12	14	18	74	93	79	4
B	30	2	27	31	30	21	14	25	82	90	83	8
B	44	1	18	22	28	28	17	21	69	54	69	4
B	40	1	30	27	24	14	13	17	78	76	74	0
B	35	2	27	24	26	13	14	20	72	77	75	1
B	59	2	29	27	25	13	13	26	93	97	85	1
B	46	2	27	26	29	12	22	16	82	89	85	8
B	37	1										0
B	54	1										9
B	34	1	27			20			80			2
